# Supplementary material for: Decomposition of Heart Failure Prevalence and Mortality Among Older Adults in the United States: Medicare-Based Partitioning Analysis
Source: JMIR Public Health Surveill. 2024 Nov 20;10:e51989. doi: 10.2196/51989 (PMC11611790; doi:10.2196/51989)
Supplement: Multimedia Appendix 1 [file publichealth-v10-e51989-s001.docx]

**Results**

**Figure S1.** Temporal trends of derivatives of heart failure prevalence and incidence-based mortality and their partitioned determinants among US adults aged 66-99 years old, 1991-2017.

Note: Data were derived from the 5% sample of Medicare Beneficiaries. = Derivative of prevalence, : = Prevalence contribution from patients diagnosed before age 65, = Prevalence contribution from patients diagnosed before year 1992, = Prevalence contribution from incidence, = Prevalence contribution from relative survival, = Derivative of mortality, = Mortality contribution from patients diagnosed before age 65, = Mortality contribution from patients diagnosed before year 1992, = Mortality contribution from incidence, = Mortality contribution from the relative survival, = Contribution from mortality in the general population.

**Supplementary Methods:**

Medicare data and ascertainment algorithm [1] results in the following variables for each eligible individual: –– initial age of follow-up, –– final age of follow-up, –– death/censoring indicator ( for death and for censoring) at age ; –– age of HF diagnosis (or missing). The superscript denotes individual characteristics. For each individual, dates of birth are available allowing us to calculate exact age at any point of the individuals’ follow-up. An individual is considered prevalent at the time of Medicare enrollment if there exists a record with the HF code during 1 year after enrollment; is an indicator of prevalence at the time of Medicare enrollment where for prevalent and for non-prevalent individuals; is an indicator of being non-prevalent at the time of Medicare enrollment.

We calculate prevalence, incidence rates, incidence-based mortality, and all-cause mortality in age- and time- bins (representing rectangles in the age and time plain where the Medicare data are available, Figure S2). Specifically, the measures are calculated in 29 age groups including 25 one-year groups between ages 65 and 90, and three other groups: 90-91, 92-94, 95-99, 100-110. Person-years after age 110 are considered invalid and ignored. Similarly we consider one-year calendar time groups in the period between year and . Thus, all age-specific measures are two-dimensional and calculated in age and time groups.

**Figure S2.** Conceptual visualization of the age- and time- bins in Medicare data.

An individual trajectory in this plain (also shown in Figure S2) contributes to different rectangle bins during each individual follow-up period. Age-specific prevalence, incidence, incidence-based mortality, and all-cause mortality in a certain rectangle bin are calculated through the ratio , where is the number of effective cases that are measure specific (i.e., for incidence, for prevalence, for incidence-based mortality, and for all-cause mortality). The number of person-years is identical for all measures and calculated as:

where and are the initial and final individual times for an age group with bounds defined by ages and in a time group with bounds and :

The numbers of effective cases are measure-specific:

These formulas are illustrated in Figure S3.

**Figure S3.** Conceptual visualization of the formulas in the study.

Reference

[1] Akushevich I, Kravchenko J, Ukraintseva S, Arbeev K, Yashin AI. Age Patterns of Incidence of Geriatric Disease in the US Elderly Population: Medicare‐Based Analysis. *Journal of the American Geriatrics Society.* 2012;60(2):323-327.
